# Supplementary material for: Pharmacogenomic-Guided Prescribing and Polypharmacy Across Age Groups in Obsessive-Compulsive Disorder: A Retrospective Study
Source: Research Square preprint supplement (doi:10.21203/rs.3.rs-8182802/v1), 2025-12-31
Supplement: Supplementary file 1 [file 15fa2b598fa6a870b952bc95.xlsx]

## Sheet: Table S3
Table S4.
Treatment response, comparison between PGx-C (same) and PGx-I (same) at admission and discharge.
	Admission			Discharge
Variable [mean (SEM), n]	PGx-C (same)	PGx-I (same)	p value	PGx-C (same)	PGx-I (same)	p value
Q-LES-Q	38.4 (6.3), 6	44.6 (2.5), 38	0.397	51.6 (6.4), 8	60.9 (3.2), 38	0.221
Y-BOCS	26.2 (2.5), 6	24.9 (1.0), 40	0.646	18.0 (1.5), 12	17.3 (1.4), 39	0.8741
QIDS	13.6 (1.2), 20	13.2 (0.6), 70	0.763	8.4 (0.8), 17	8.9 (0.6), 63	0.615
PQ-LES-Q	39.6 (3.4), 13	40.3 (2.1), 26	0.872	49.3 (3.5), 9	49.6 (1.6), 25	0.946
CY-BOCS	22.5 (1.7), 15	24.5 (1.1), 35	0.337	15.5 (1.3), 16	16.6 (1.0), 28	0.477
PROMIS-D	25.6 (3.3), 3	13.9 (2.0), 8	0.043	13.0 (–), 1	8.4 (3.3), 5	–
Length of Stay (days) (SEM) [range], adult				38.4 (3.7) [8-64]	46.8 (2.9) [8-119]	0.084
Length of Stay (days) (SEM) [range], child and adolescent				43.4 (5.9) [21-79]	40.6 (2.9) [13-102]	0.676
Treatment response, comparison between TAU and PGx-I at admission and discharge.
	Admission			Discharge
Variable [mean (SEM), n]	TAU	PGx-I	p value	TAU	PGx-I	p value
Q-LES-Q	43.2 (1.9), 77	44.8 (2.4), 40	0.602	51.3 (1.1), 76	60.9 (3.2), 38	0.733
Y-BOCS	25.1 (0.8), 73	24.9 (1.1), 38	0.887	18.3 (0.9), 61	17.3 (1.4), 39	0.568
QIDS	13.4 (0.5), 133	12.8 (0.7), 60	0.483	8.9 (0.5), 130	8.9 (0.6), 63	0.963
PQ-LES-Q	42.4 (1.2), 77	40.7 (2.0), 27	0.463	51.3 (1.1), 76	49.2 (1.6), 26	0.295
CY-BOCS	21.9 (0.9), 74	25.1 (1.2), 28	0.04	14.7 (0.8), 79	16.6 (1.0), 28	0.142
PROMIS-D	16.9 (2.0), 20	14.5 (2.2), 8	0.427	9.9 (1.9), 17	8.4 (3.3), 5	0.699
Length of Stay (days) (SEM) [range], adult				44.7 (2.7) [1-145]	46.8 (2.8) [8-119]	0.597
Length of Stay (days) (SEM) [range], child and adolescent				41.1 (1.7) [1-139]	40.9 (2.8) [13-102]	0.939
*PGx-I group is those who were categorized in the incongruent group at discharge (n=85)
