# Supplementary material for: Pharmacogenomic-Guided Prescribing and Polypharmacy Across Age Groups in Obsessive-Compulsive Disorder: A Retrospective Study
Source: Research Square preprint supplement (doi:10.21203/rs.3.rs-8182802/v1), 2025-12-31
Supplement: Supplementary file 2 [file 20860a89f65b44ddc06b11d9.xlsx]

## Sheet: Table S3
Table S2.
Correlation between incongruent medication and total medication at discharge.
Comparison	ρ (Spearman)	p value	Rate Ratio (RR)	95% CI for RR
All ages	0.48	<0.001	1.36	[1.23, 1.50]
Incongruent (#) vs. total psychotropics (#)	0.467	<0.001	2.29	[1.66, 3.16]
Incongruent (#) vs. total antidepressants (#)
Adult
Incongruent (#) vs. total psychotropics (#)	0.529	<0.001	1.31	[1.18, 1.46]
Incongruent (#) vs. total antidepressants (#)	0.488	<0.001	—	—
Child/adolescent
Incongruent (#) vs. total psychotropics (#)	0.247	0.094	1.29	[0.94, 1.76]
Incongruent (#) vs. total antidepressants (#)	0.397	0.006	—	—
