# Supplementary material for: Pharmacogenomic-Guided Prescribing and Polypharmacy Across Age Groups in Obsessive-Compulsive Disorder: A Retrospective Study
Source: Research Square preprint supplement (doi:10.21203/rs.3.rs-8182802/v1), 2025-12-31
Supplement: Supplementary file 3 [file 40e100b0522201940cacbdb4.xlsx]

## Sheet: Table 2 Medications
Table S5.
Medications, comparison between groups at admission and discharge.
Variable [mean (SEM), n]	TAU	PGx-I	p value	TAU	PGx-I	p value
Average medication count, all ages
All psychotropic medications	1.6 (0.3), 27	2.5 (0.1), 95	0.003	2.3 (0.2), 40	3.1 (0.2), 82	0.005
Antidepressants	0.6 (0.1), 27	1.2 (0.1), 95	<0.001	1.1 (0.1), 40	1.4 (0.1), 82	0.016
Antipsychotics	0.2 (0.1), 27	0.5 (0.1), 95	0.033	0.4 (0.1), 40	0.6 (0.1), 82	0.014
Average medication count, adults
All psychotropic medications	1.4 (0.3), 17	2.8 (0.2), 55	<0.001	2.4 (0.3), 22	3.5 (0.2), 53	0.005
Antidepressants	0.5 (0.2), 17	1.3 (0.1), 55	<0.001	1.1 (0.1), 22	1.4 (0.1), 53	0.07
Antipsychotics	0.2 (0.1), 17	0.4 (0.1), 55	0.069	0.3 (0.1), 22	0.5 (0.1), 53	0.08
Average medication count, child and adolescent
All psychotropic medications	1.9 (0.5), 10	2.0 (0.2), 37	0.793	2.3 (0.3), 18	2.4 (0.2), 29	0.735
Antidepressants	0.9 (0.2), 10	1.1 (0.1), 37	0.455	1.0 (0.1), 18	1.2 (0.1), 29	0.175
Antipsychotics	0.3 (0.2), 10	0.5 (0.1), 37	0.277	0.4 (0.1), 18	0.8 (0.1), 29	0.037
