# Supplementary material for: Pharmacogenomic-Guided Prescribing and Polypharmacy Across Age Groups in Obsessive-Compulsive Disorder: A Retrospective Study
Source: Research Square preprint supplement (doi:10.21203/rs.3.rs-8182802/v1), 2025-12-31
Supplement: Supplementary file 4 [file af74c92dd8c8abc371401d9c.xlsx]

## Sheet: Table S2 PGx-C-PGx-I
Table S3
Treatment response, comparison between PGx-C and PGx-I at admission and discharge.
	Admission			Discharge
Variable [mean (SEM), n]	PGx-C	PGx-I	p value	PGx-C	PGx-I	p value
Q-LES-Q	41.1 (5.0), 8	43.6 (2.3), 43	0.659	56.9 (3.8), 15	60.9 (3.2), 38	0.432
Y-BOCS	26.2 (2.5), 6	24.9 (1.0), 40	0.646	18.0 (1.5), 12	17.3 (1.4), 39	0.741
QIDS	13.6 (1.2), 20	13.2 (0.6), 70	0.763	8.4 (0.8), 32	8.9 (0.6), 63	0.615
PQ-LES-Q	40.4 (3.3), 14	40.8 (1.7), 34	0.916	49.3 (2.0), 17	49.2 (1.6), 26	0.969
CY-BOCS	22.5 (1.7), 15	24.5 (1.1), 35	0.337	15.5 (1.3), 16	16.6 (1.0), 28	0.477
PROMIS-D	25.7 (3.3), 3	13.9 (2.0), 8	0.043	13.0 (NA), 1	8.4 (3.3), 5	NA
Length of Stay (days) (SEM) [range], adult				41.6 (3.1), 23	46.8 (2.8), 51	0.216
Length of Stay (days) (SEM) [range], child and adolescent				40.2 (3.9), 17	40.9 (2.8), 31	0.885
