# Supplementary material for: Pharmacogenomic-Guided Prescribing and Polypharmacy Across Age Groups in Obsessive-Compulsive Disorder: A Retrospective Study
Source: Research Square preprint supplement (doi:10.21203/rs.3.rs-8182802/v1), 2025-12-31
Supplement: Supplementary file 5 [file c3801c991a57b89e64e74f5b.xlsx]

## Sheet: Table S1
Table S1	Frequency of CYP2D6, CYP2C19 and CYP2B6 variants.
	Poor metabolizer	Intermediate metabolizer	Normal metabolizer	Ultrarapid metabolizer
CYP2D6	9% (11/122)	26% (32/122)	59% (72/122)	6% (7/122)
CYP2C19	4% (5/122)	7% (8/122)	64% (78/122)	25% (31/122)
CYP2B6	3% (4/122)	34% (42/122)	52% (63/122)	11% (13/122)
	Psychotropic medication change from admission to discharge by recommendation.
	Discharge
	Use as directed	Use with caution	Use with increased caution	No psychotropic medication prescribed
Admission
Use as directed	22	2	0	0
Use with caution	12	33	3	0
Use with increased caution	5	7	35	0
No psychotropic medication prescribed	1	2	0	0
